# Supplementary material for: Inhibition of Circulating miR-194-5p Reverses Osteoporosis through Wnt5a/β-Catenin-Dependent Induction of Osteogenic Differentiation
Source: PubMed Central journal article supplement — Mol Ther Nucleic Acids. 2020 Jul 23;21:814–23. doi: 10.1016/j.omtn.2020.07.023 (PMC7419275; doi:10.1016/j.omtn.2020.07.023), 2020-07-23
Supplement: mmc1.pdf [file mmc1.pdf]

OMTN, Volume 21

## **Supplemental Information**

**Inhibition of Circulating miR-194-5p Reverses**

**Osteoporosis through Wnt5a/ $\beta$ -Catenin-**

**Dependent Induction of Osteogenic Differentiation**

**Bobin Mi, Chenchen Yan, Hang Xue, Lang Chen, Adriana C. Panayi, Liangcong Hu, Yiqiang Hu, Faqi Cao, Yun Sun, Wu Zhou, Yuan Xiong, and Guohui Liu**

**Inhibition of circulating miR-194-5p reverses osteoporosis through Wnt5a/ $\beta$ -catenin signaling-dependent induction of osteogenic differentiation**

Bobin Mi<sup>1,4</sup>, Chenchen Yan<sup>1,4</sup>, Hang Xue<sup>1,4</sup>, Lang Chen<sup>1</sup>, Adriana C. Panayi, M.D.<sup>2</sup>, Liangcong Hu<sup>1</sup>, Yiqiang Hu<sup>1</sup>, Faqi Cao<sup>1</sup>, Yun Sun<sup>3</sup>, Wu Zhou<sup>1</sup>, Yuan Xiong<sup>1</sup>, Guohui Liu<sup>1</sup>

<sup>1</sup>Department of Orthopaedics, Union Hospital, Tongji Medical College, Huazhong University of Science and Technology, Wuhan 430022, China;

<sup>2</sup>Division of Plastic Surgery, Brigham and Women's Hospital, Harvard Medical School, Boston, MA 02215, USA;

<sup>3</sup>Department of Neurosurgery, Union Hospital, Tongji Medical College, Huazhong University of Science and Technology, Wuhan 430022, China;

<sup>4</sup>These author contributed equally to this work,

**Correspondence:** Yuan Xiong, Department of Orthopaedics, Union Hospital, Tongji Medical College, Huazhong University of Science and Technology, 1277 Jiefang Avenue, Wuhan 430022, China. Email: xiongyuanmed@163.com.

**Correspondence:** Guohui Liu, Department of Orthopaedics, Union Hospital, Tongji Medical College, Huazhong University of Science and Technology, 1277 Jiefang Avenue, Wuhan 430022, China. E-mail: liuguohui@hust.edu.cn

**Table S1. Information of osteopenia volunteers and osteoporosis volunteers. (Osteopenia,  $-2.5 \leq$ Spine T-score $\leq -1.0$ ; Osteoporosis, Spine T-score  $< -2.5$ ).**

| Volunteer     | Age (Year) | Spine T-score | Volunteer       | Age (Year) | Spine T-score |
|---------------|------------|---------------|-----------------|------------|---------------|
| Osteopenia 1  | 63         | -1.6          | Osteoporosis 1  | 60         | -2.8          |
| Osteopenia 2  | 67         | -1.9          | Osteoporosis 2  | 66         | -3.1          |
| Osteopenia 3  | 58         | -1.5          | Osteoporosis 3  | 69         | -3.2          |
| Osteopenia 4  | 54         | -1.1          | Osteoporosis 4  | 63         | -2.6          |
| Osteopenia 5  | 56         | -1.2          | Osteoporosis 5  | 58         | -2.8          |
| Osteopenia 6  | 66         | -1.7          | Osteoporosis 6  | 69         | -3.4          |
| Osteopenia 7  | 52         | -1.0          | Osteoporosis 7  | 67         | -2.8          |
| Osteopenia 8  | 71         | -1.8          | Osteoporosis 8  | 65         | -2.7          |
| Osteopenia 9  | 63         | -1.4          | Osteoporosis 9  | 64         | -3.1          |
| Osteopenia 10 | 68         | -1.6          | Osteoporosis 10 | 73         | -3.8          |
| Osteopenia 11 | 65         | -1.9          | Osteoporosis 11 | 69         | -3.6          |

|               |    |      |                 |    |      |
|---------------|----|------|-----------------|----|------|
| Osteopenia 12 | 66 | -2.1 | Osteoporosis 12 | 68 | -3.1 |
| Osteopenia 13 | 59 | -1.5 | Osteoporosis 13 | 64 | -2.9 |
| Osteopenia 14 | 62 | -1.3 | Osteoporosis 14 | 59 | -2.8 |
| Osteopenia 15 | 57 | -1.4 | Osteoporosis 15 | 57 | -3.2 |
| Osteopenia 16 | 68 | -1.8 | Osteoporosis 16 | 53 | -3.5 |
| Osteopenia 17 | 65 | -1.5 | Osteoporosis 17 | 60 | -3.5 |
| Osteopenia 18 | 62 | -1.2 | Osteoporosis 18 | 59 | -3.1 |
| Osteopenia 19 | 60 | -1.1 | Osteoporosis 19 | 55 | -3.3 |
| Osteopenia 20 | 64 | -1.5 | Osteoporosis 20 | 53 | -2.8 |
| Osteopenia 21 | 58 | -1.1 | Osteoporosis 21 | 68 | -3.9 |
| Osteopenia 22 | 62 | -1.3 | Osteoporosis 22 | 74 | -4.2 |
| Osteopenia 23 | 66 | -1.2 | Osteoporosis 23 | 66 | -4.0 |
| Osteopenia 24 | 69 | -1.8 | Osteoporosis 24 | 65 | -3.2 |
| Osteopenia 25 | 57 | -1.5 | Osteoporosis 25 | 60 | -3.9 |
| Osteopenia 26 | 56 | -1.1 | Osteoporosis 26 | 68 | -2.5 |
| Osteopenia 27 | 63 | -1.9 | Osteoporosis 27 | 61 | -3.6 |
| Osteopenia 28 | 52 | -1.4 | Osteoporosis 28 | 72 | -3.9 |
| Osteopenia 29 | 54 | -1.3 | Osteoporosis 29 | 70 | -3.5 |
| Osteopenia 30 | 50 | -1.1 | Osteoporosis 30 | 57 | -2.9 |
| Osteopenia 31 | 59 | -1.7 | Osteoporosis 31 | 61 | -2.7 |
| Osteopenia 32 | 62 | -1.5 | Osteoporosis 32 | 64 | -2.6 |
| Osteopenia 33 | 61 | -1.4 | Osteoporosis 33 | 65 | -3.1 |
| Osteopenia 34 | 60 | -1.8 | Osteoporosis 34 | 60 | -2.6 |
| Osteopenia 35 | 68 | -1.5 | Osteoporosis 35 | 62 | -3.2 |
| Osteopenia 36 | 64 | -1.9 | Osteoporosis 36 | 67 | -3.6 |
| Osteopenia 37 | 62 | -1.8 | Osteoporosis 37 | 69 | -3.4 |
| Osteopenia 38 | 66 | -1.6 | Osteoporosis 38 | 65 | -2.8 |
| Osteopenia 39 | 59 | -1.2 | Osteoporosis 39 | 58 | -3.2 |
| Osteopenia 40 | 57 | -1.1 | Osteoporosis 40 | 63 | -3.6 |
| Osteopenia 41 | 53 | -1.1 | Osteoporosis 41 | 54 | -2.7 |
| Osteopenia 42 | 58 | -1.5 | Osteoporosis 42 | 58 | -2.6 |
| Osteopenia 43 | 59 | -2.1 | Osteoporosis 43 | 55 | -2.6 |
| Osteopenia 44 | 62 | -1.8 | Osteoporosis 44 | 60 | -2.8 |
| Osteopenia 45 | 64 | -2.2 | Osteoporosis 45 | 63 | -3.2 |
| Osteopenia 46 | 68 | -2.4 | Osteoporosis 46 | 59 | -2.9 |
| Osteopenia 47 | 53 | -1.5 | Osteoporosis 47 | 57 | -3.5 |
| Osteopenia 48 | 56 | -1.6 | Osteoporosis 48 | 68 | -3.1 |
| Osteopenia 49 | 58 | -1.5 | Osteoporosis 49 | 63 | -2.8 |
| Osteopenia 50 | 64 | -1.3 | Osteoporosis 50 | 66 | -2.9 |

**Table S2. miRNA and mRNA Primer Sequences.**

| miRNA or Gene name     | Primer Sequence (5' to 3')                     |
|------------------------|------------------------------------------------|
| mmu-miR-194-5p-Forward | GCGGCGGTGTAACAGAACTCC                          |
| mmu-miR-194-5p-Reverse | ATCCAGTGCAGGGTCCGAGG                           |
| hsa-miR-194-5p-Forward | CTAGTACCTAGAGGAACCTTTGAAGACTGTT<br>ACAGCTCAGCA |
| has-miR-194-5p-Reverse | AGCTTGCTGAGCTGTAACAGTCTTCAAAGGT<br>TCCTCTAGGTA |
| mmu-Runx2-Forward      | CGCCACCACTCACTACCACAC                          |
| mmu-Runx2-Reverse      | TGGATTTAATAGCGTGCTGCC                          |
| mmu-OCN-Forward        | TTCTGCTCACTCTGCTGACCC                          |
| mmu-OCN-Reverse        | CTGATAGCTCGTCACAAGCAGG                         |
| U6-Forward             | GTGGACCGCACAAAGCTCGCT                          |
| U6-Reverse             | TTGTTGAACGGCACTGTGTATAGCA                      |
| GAPDH-Forward          | TGAAGGGTGGAGCCAAAAG                            |
| GAPDH-Reverse          | AGTCTTCTGGGTGGCAGTGAT                          |
